# Supplementary material for: Skeletal Muscle-Specific Bis Depletion Leads to Muscle Dysfunction and Early Death Accompanied by Impairment in Protein Quality Control
Source: MDPI journal article supplement (doi:10.3390/ijms24119635), 2023-06-01
Supplement: s1 [file s1]

**Table S1.** Primers used for qRT-PCR in this study.

| <b>Targets</b> |         | <b>Sequences (5'-3')</b>   |
|----------------|---------|----------------------------|
| MYH3           | Forward | ACACGGATCAGAGAGCTGGA       |
|                | Reverse | CCTTAACACGCCGCTCATAAC      |
| myogenin       | Forward | CCTTGCTCAGCTCCCTCA         |
|                | Reverse | TGGGAGTTGCATTCACTGG        |
| HSPB8          | Forward | ATGAAGAGAAGCAGCAGGAAGGTG   |
|                | Reverse | TGGTTGTCTTGAGGAAGCTCGTTG   |
| HSPB5          | Forward | CGGACTCTCAGAGATGCGTT       |
|                | Reverse | TGGGATCCGGTACTTCCTGT       |
| HSP70          | Forward | AGACTGTTGAGTTCTTTGTGTTTGGA |
|                | Reverse | GAAGGACCCGACACAAGCAT       |
| CTGF           | Forward | CACAGAGTGGAGCGCCTGTTC      |
|                | Reverse | GATGCACTTTTTGCCCTTCTTAATG  |
| CYR61          | Forward | GATGACCTCCTCGGACTCGAT      |
|                | Reverse | GGTTCGGTGCCAAAGACAGG       |
| ANKRD1         | Forward | CCTGCGAGGCTGATCTCAAT       |
|                | Reverse | GGTCTTCCCAGCACAGTTCTT      |
| GAPDH          | Forward | GGTGTGAACGGATTTGGCCGTATT   |
|                | Reverse | GGCCTTGACTGTGCCGTTGAATTT   |

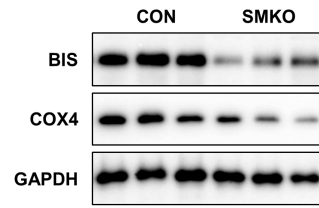

**Figure S1.** Expression of COX4 in the diaphragm of control and *Bis*-SMKO mice. Expression of BIS, COX4 and GAPDH in the diaphragm of control and *Bis*-SMKO mice was analyzed by western blotting. CON, control; SMKO, *Bis*-SMKO.

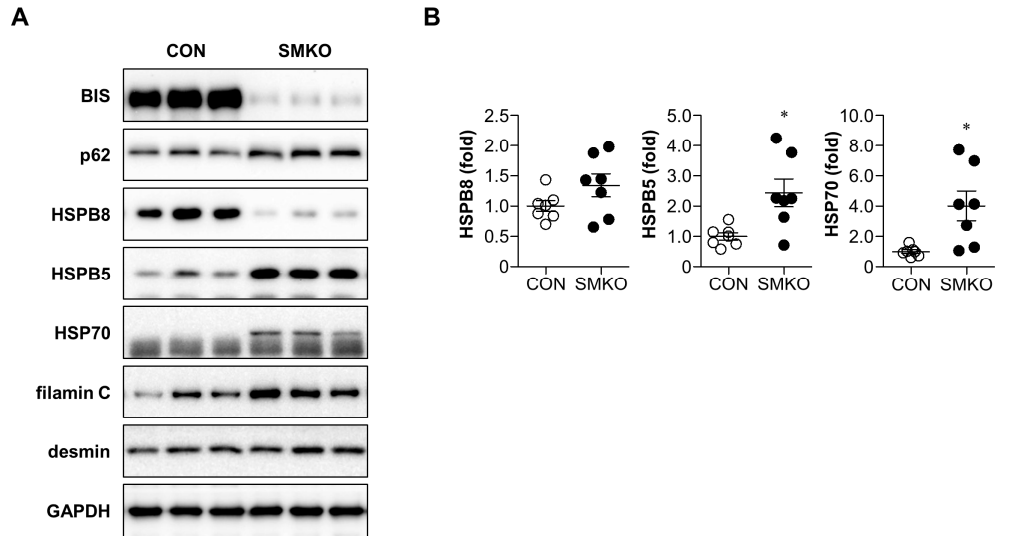

**Figure S2.** Protein and mRNA expression in the quadriceps of control and *Bis*-SMKO mice. **(A)** Expression of BIS, p62, HSPB8, HSPB5, HSP70, filamin C, desmin and GAPDH in the quadriceps of control and *Bis*-SMKO mice was analyzed by western blotting. **(B)** mRNA expression of HSPB8, HSPB5 and HSP70 in the quadriceps of control and *Bis*-SMKO mice was analyzed by qRT-PCR (N = 7 for both groups) as shown in Figure 2C. CON, control; SMKO, *Bis*-SMKO. Data are presented as mean  $\pm$  SEM. \*  $p < 0.05$  compared to control.

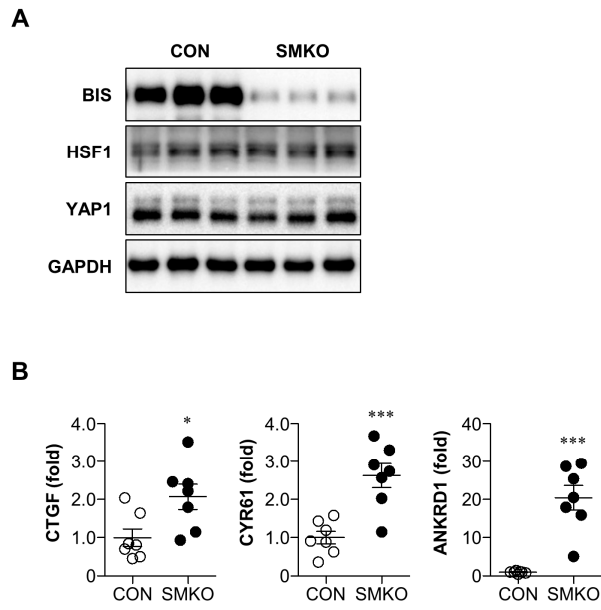

**Figure S3.** Enhanced YAP1 downstream signaling in the quadriceps of control and *Bis*-SMKO mice. **(A)** Expression of BIS, HSF1, YAP1 and GAPDH in the quadriceps of control and *Bis*-SMKO mice was accessed by western blotting. **(B)** mRNA expression of downstream targets of YAP1 including CTGF, CYR61 and ANKRD1 in the quadriceps of control and *Bis*-SMKO mice was analyzed by qRT-PCR (N = 7 for both groups) as shown in Figure 2C. CON, control; SMKO, *Bis*-SMKO. Data are presented as mean  $\pm$  SEM. \*  $p < 0.05$  and \*\*\*  $p < 0.001$  compared to control.
